# Supplementary material for: Efficacy and safety of hyperbaric oxygen therapy for fibromyalgia: a systematic review and meta-analysis
Source: PubMed Central journal article supplement — BMJ Open. 2023 Jan 23;13(1):e062322. doi: 10.1136/bmjopen-2022-062322 (PMC9872467; doi:10.1136/bmjopen-2022-062322), 2023-01-23
Supplement: bmjopen-2022-062322supp001.pdf [file bmjopen-2022-062322supp001.pdf]

## Pubmed

| Search | Query                                                                                                                                                                                                                                                                       | Results                | Time     |
|--------|-----------------------------------------------------------------------------------------------------------------------------------------------------------------------------------------------------------------------------------------------------------------------------|------------------------|----------|
| #7     | Search: ((hyperbaric oxygenation [MeSH Terms]) OR ((hyperbaric[Title/Abstract]) OR (HBOT[Title/Abstract]))) AND ((fibromyalgia[MeSH Terms]) OR ("fibromyalgia" OR "fibrositic nodule" OR "fibrositic nodule" OR "fibrositis" OR "fibrositis syndrome" OR "myalgia, fibro")) | <a href="#">22</a>     | 20:08:04 |
| #6     | Search: "fibromyalgia" OR "fibrositic nodule" OR "fibrositic nodule" OR "fibrositis" OR "fibrositis syndrome" OR "myalgia, fibro"                                                                                                                                           | <a href="#">13,579</a> | 20:06:54 |
| #5     | Search: (hyperbaric oxygenation[MeSH Terms]) OR ((hyperbaric[Title/Abstract]) OR (HBOT[Title/Abstract]))                                                                                                                                                                    | <a href="#">18,499</a> | 20:04:55 |
| #4     | Search: fibromyalgia[MeSH Terms]                                                                                                                                                                                                                                            | <a href="#">9,569</a>  | 20:04:01 |
| #3     | Search: (hyperbaric[Title/Abstract]) OR (HBOT[Title/Abstract])                                                                                                                                                                                                              | <a href="#">15,251</a> | 20:02:45 |
| #2     | Search: hyperbaric oxygenation[MeSH Terms]                                                                                                                                                                                                                                  | <a href="#">12,570</a> | 20:02:10 |

| Search | Actions | Details | Query                                                                                                                                                                                                                                                                            | Results                | Time     |
|--------|---------|---------|----------------------------------------------------------------------------------------------------------------------------------------------------------------------------------------------------------------------------------------------------------------------------------|------------------------|----------|
| #7     | ...     | >       | Search: ((((((fibromyalgia) OR (fibrositic nodule)) OR (fibrositic nodule) OR (fibrositis) OR (fibrositis syndrome)) OR (myalgia, fibro)) OR (fibromyalgia[MeSH Terms])) AND ((hyperbaric oxygenation[MeSH Terms]) OR ((hyperbaric[Title/Abstract]) OR (HBOT[Title/Abstract])))) | <a href="#">22</a>     | 20:08:04 |
| #6     | ...     | >       | Search: ((((((fibromyalgia) OR (fibrositic nodule)) OR (fibrositic nodule) OR (fibrositis) OR (fibrositis syndrome)) OR (myalgia, fibro))                                                                                                                                        | <a href="#">13,579</a> | 20:06:54 |
| #5     | ...     | >       | Search: (hyperbaric oxygenation[MeSH Terms]) OR ((hyperbaric[Title/Abstract]) OR (HBOT[Title/Abstract]))                                                                                                                                                                         | <a href="#">18,499</a> | 20:04:55 |
| #4     | ...     | >       | Search: fibromyalgia[MeSH Terms]                                                                                                                                                                                                                                                 | <a href="#">9,569</a>  | 20:04:01 |
| #3     | ...     | >       | Search: (hyperbaric[Title/Abstract]) OR (HBOT[Title/Abstract])                                                                                                                                                                                                                   | <a href="#">15,251</a> | 20:02:45 |
| #2     | ...     | >       | Search: hyperbaric oxygenation[MeSH Terms]                                                                                                                                                                                                                                       | <a href="#">12,570</a> | 20:02:10 |

## EMBASE

Database(s): Embase

Search Strategy:

#

Searches

Results

1

'hyperbaric oxygen therapy'/exp

18807

2

'high pressure oxygen':ab,ti OR 'high tension o2':ab,ti OR 'high tension oxygen':ab,ti OR

'hyperbaric medicine':ab,ti OR 'hyperbaric o2':ab,ti OR 'hyperbaric oxygen':ab,ti OR  
'hyperbaric oxygenation':ab,ti OR 'hyperbaric oxygenisation':ab,ti OR 'hyperbaric  
oxygenization':ab,ti OR 'oxygen, hyperbaric':ab,ti OR 'hbot':ab,ti

13020

3

1 OR 2

20223

4

'fibromyalgia'/exp

21352

5

'fibromyalgia':ab,ti OR 'fibrositic nodule':ab,ti OR 'fibrositis':ab,ti OR 'fibrositis syndrome':ab,ti  
OR 'myalgia, fibro':ab,ti

17507

6

4 OR 5

22891

7

3 AND 6

43

| <input type="checkbox"/> History | Save   Delete   Print view   Export   Email                                                                                                                                                                                                                                                                                               | Combine > | using <input checked="" type="radio"/> And <input type="radio"/> Or | ^ Collapse |
|----------------------------------|-------------------------------------------------------------------------------------------------------------------------------------------------------------------------------------------------------------------------------------------------------------------------------------------------------------------------------------------|-----------|---------------------------------------------------------------------|------------|
| <input type="checkbox"/> #7      | #3 AND #6                                                                                                                                                                                                                                                                                                                                 |           |                                                                     | 43         |
| <input type="checkbox"/> #6      | #4 OR #5                                                                                                                                                                                                                                                                                                                                  |           |                                                                     | 22,891     |
| <input type="checkbox"/> #5      | 'fibromyalgia':ab,ti OR 'fibrositic nodule':ab,ti OR 'fibrositis':ab,ti OR 'fibrositis syndrome':ab,ti OR 'myalgia, fibro':ab,ti                                                                                                                                                                                                          |           |                                                                     | 17,507     |
| <input type="checkbox"/> #4      | 'fibromyalgia'/exp                                                                                                                                                                                                                                                                                                                        |           |                                                                     | 21,352     |
| <input type="checkbox"/> #3      | #1 OR #2                                                                                                                                                                                                                                                                                                                                  |           |                                                                     | 20,223     |
| <input type="checkbox"/> #2      | 'high pressure oxygen':ab,ti OR 'high tension o2':ab,ti OR 'high tension oxygen':ab,ti OR 'hyperbaric medicine':ab,ti OR<br>'hyperbaric o2':ab,ti OR 'hyperbaric oxygen':ab,ti OR 'hyperbaric oxygenation':ab,ti OR 'hyperbaric oxygenisation':ab,ti OR<br>'hyperbaric oxygenization':ab,ti OR 'oxygen, hyperbaric':ab,ti OR 'hbot':ab,ti |           |                                                                     | 13,020     |
| <input type="checkbox"/> #1      | 'hyperbaric oxygen therapy'/exp                                                                                                                                                                                                                                                                                                           |           |                                                                     | 18,807     |

### Web of Science (1900-present)

1

Topic=("fibromyalgia" OR "fibrositic nodule" OR "fibrositis" OR "fibrositis syndrome" OR  
"myalgia, fibro")

31305

2

Topic=(Hyperbaric OR HBOT)

28136

3

1 AND 2

45

0/3 Combine Sets Export Clear History

|                          |   |                                                                                                                            |        |              |   |   |   |
|--------------------------|---|----------------------------------------------------------------------------------------------------------------------------|--------|--------------|---|---|---|
| <input type="checkbox"/> | 3 | #2 AND #1                                                                                                                  | 45     | Add to query | 🔗 | ✎ | 🔔 |
| <input type="checkbox"/> | 2 | (TS=(Hyperbaric)) OR TS=(HBOT)                                                                                             | 28,136 | Add to query | 🔗 | ✎ | 🔔 |
| <input type="checkbox"/> | 1 | (((((TS=(fibromyalgia)) OR TS=(fibrositic nodule)) OR TS=(fibrositis)) OR TS=(fibrositis syndrome)) OR TS=(myalgia, fibro) | 31,305 | Add to query | 🔗 | ✎ | 🔔 |

## Cochrane

### ID Search Hits

- #1 MeSH descriptor: [Hyperbaric Oxygenation] explode all trees 431
- #2 hyperbaric or hbot:ti,ab,kw (Word variations have been searched) 3504
- #3 MeSH descriptor: [Fibromyalgia] explode all trees 1598
- #4 "fibromyalgia" OR "fibrositic nodule" OR "fibrositis" OR "fibrositis syndrome":ti,ab,kw 3469
- #5 #1 OR #2 3504
- #6 #3 OR #4 3469
- #7 #5 AND #6 17

|     |                                                             |        |             |
|-----|-------------------------------------------------------------|--------|-------------|
| #1  | MeSH descriptor: [Hyperbaric Oxygenation] explode all trees | MeSH   | 431         |
| #2  | (hyperbaric):ti,ab,kw                                       | S      | Limits 3501 |
| #3  | (hbot):ti,ab,kw                                             | S      | Limits 264  |
| #4  | #3 OR #2                                                    | Limits | 3504        |
| #5  | MeSH descriptor: [Fibromyalgia] explode all trees           | MeSH   | 1598        |
| #6  | (fibromyalgia):ti,ab,kw                                     | S      | Limits 3427 |
| #7  | (fibrositic nodule):ti,ab,kw                                | S      | Limits 0    |
| #8  | (fibrositis):ti,ab,kw                                       | S      | Limits 63   |
| #9  | (fibrositis syndrome):ti,ab,kw                              | S      | Limits 10   |
| #10 | #1 OR #4                                                    | Limits | 3504        |
| #11 | #6 OR #7 OR #8 OR #9                                        | Limits | 3469        |
| #12 | #5 OR #11                                                   | Limits | 3469        |
| #13 | #10 AND #12                                                 | Limits | 17          |

## CNKI (Chinese database)

(篇关摘=高压氧) AND (篇关摘=纤维肌痛)

0

## VIP (Chinese database)

(题名或关键词=高压氧) AND (题名或关键词=纤维肌痛)

0

## WANFANG (Chinese database)

题名或关键词: (高压氧 and 纤维肌痛)

0
